# Supplementary material for: Common lizard microhabitat selection varies by sex, parity mode, and colouration
Source: PubMed Central journal article supplement (PMC10478496; doi:10.1186/s12862-023-02158-2), 2023-09-04
Supplement: 12862_2023_2158_MOESM1_ESM.pdf [file 12862_2023_2158_MOESM1_ESM.pdf]

**Additional file 1. Table S1.** Parameters in zero-and-one-inflated beta regression

models favoured by DIC.

| Habitat type | Class              | Model parameters                            |                                                              |                                  |                                        |
|--------------|--------------------|---------------------------------------------|--------------------------------------------------------------|----------------------------------|----------------------------------------|
|              |                    | Mixture parameter ( $\alpha$ ) <sup>1</sup> | Bernoulli distribution probability ( $\gamma$ ) <sup>2</sup> | Beta distribution mean ( $\mu$ ) | Beta distribution precision ( $\phi$ ) |
| Angiosperm   | Random             | 0.59                                        | 0                                                            | 0.03                             | 37.90                                  |
|              | Lizard, oviparous  | 0.87                                        | 0                                                            | 0.14                             | 11.15                                  |
|              | Lizard, viviparous | 0.65                                        | 0                                                            | 0.11                             | 11.15                                  |
| Grass        | Random             | 0.04                                        | 0.67                                                         | 0.70                             | 2.71                                   |
|              | Lizard             | 0.04                                        | 0.74                                                         | 0.55                             | 2.71                                   |
| Leaf litter  | Random             | 0.90                                        | 0                                                            | 0.1                              | 29.61                                  |
|              | Lizard             | 0.93                                        | 0                                                            | 0.18                             | 8.55                                   |
| Moss         | Random             | 0.88                                        | 0                                                            | 0.24                             | 3.97                                   |
|              | Lizard, oviparous  | 0.71                                        | 0                                                            | 0.22                             | 3.97                                   |
|              | Lizard, viviparous | 0.86                                        | 0                                                            | 0.19                             | 3.97                                   |
| Rock         | Random             | 0.83                                        | 0                                                            | 0.29                             | 2.05                                   |
|              | Lizard             | 0.89                                        | 0                                                            | 0.27                             | 6.04                                   |
| Water        | Random             | 0.99                                        | 0                                                            | 0.14                             | 11.92                                  |
|              | Lizard, oviparous  | 0.91                                        | 0                                                            | 0.19                             | 11.92                                  |
|              | Lizard, viviparous | 0.99                                        | 0                                                            | 0.14                             | 11.92                                  |
| Wood         | Random             | 0.86                                        | 0                                                            | 0.22                             | 3.14                                   |
|              | Lizard, female     | 0.42                                        | 0                                                            | 0.47                             | 3.14                                   |
|              | Lizard, male       | 0.47                                        | 0                                                            | 0.42                             | 3.14                                   |
| Other        | Random             | 0.94                                        | 0                                                            | 0.14                             | 8.89                                   |
|              | Lizard, oviparous  | 0.97                                        | 0                                                            | 0.39                             | 8.89                                   |
|              | Lizard, viviparous | 0.92                                        | 0                                                            | 0.19                             | 8.89                                   |
| Cover        | Random             | 0.06                                        | 0.66                                                         | 0.65                             | 2.31                                   |
|              | Lizard, oviparous  | 0.01                                        | 0.61                                                         | 0.54                             | 2.31                                   |
|              | Lizard, viviparous | 0.12                                        | 0.59                                                         | 0.56                             | 2.31                                   |
| Bare ground  | Random             | 0.58                                        | 0                                                            | 0.18                             | 4.91                                   |
|              | Lizard, female     | 0.57                                        | 0                                                            | 0.16                             | 10.07                                  |
|              | Lizard, male       | 0.67                                        | 0                                                            | 0.19                             | 10.07                                  |

<sup>1</sup>Where  $\gamma = 0$ , the mixture parameter,  $\alpha$ , represents the probability of the microhabitat being absent (proportion = 0).

<sup>2</sup>Where  $\gamma = 0$ , no microhabitat proportions of 1 were observed, otherwise  $\gamma$  is the estimated probability that a discrete proportion is 1 rather than 0.
