# Supplementary material for: Common lizard microhabitat selection varies by sex, parity mode, and colouration
Source: PubMed Central journal article supplement (PMC10478496; doi:10.1186/s12862-023-02158-2), 2023-09-04
Supplement: 12862_2023_2158_MOESM2_ESM.pdf [file 12862_2023_2158_MOESM2_ESM.pdf]

**Additional file 2. Table S2.** Statistical models performed on lizard colouration and patterning. The effect of any significantly associated variable in a model is shown.

| model ID | response variable            | explanatory variables                   | test  | sign. associated variables   | num. df | den. Df | t - or F - value | p - value |     |
|----------|------------------------------|-----------------------------------------|-------|------------------------------|---------|---------|------------------|-----------|-----|
| 1        | dorsal colouration (H)       | sex, body length, body weight           | GLM   | body length                  | 2       | 301     | 4.61             | <0.001    | *** |
|          |                              |                                         |       | sex                          |         |         | 2.29             | <0.05     | *   |
|          | dorsal colouration (S)       | sex, body length, body weight           | GLM   | body length                  | 4       | 299     | 3.49             | <0.01     | **  |
|          |                              |                                         |       | body weight                  |         |         | -3.44            | <0.001    | *** |
|          | dorsal colouration (L)       | sex, body length, body weight           | GLM   | -                            | -       | -       | -                | -         |     |
| 2        | dorsal patterning            | sex, body length, body weight           | GLM   | sex                          | 3       | 387     | 3.051            | <0.01     | **  |
|          |                              |                                         |       | body length                  |         |         | 2.785            | <0.01     | **  |
| 3        | dorsal colouration (H)       | dorsal patterning                       | ANOVA | dorsal patterning            | 2       | 299     | 3.04             | <0.05     | *   |
|          | dorsal colouration (S)       | dorsal patterning                       | ANOVA | -                            | -       | -       | -                | -         |     |
|          | dorsal colouration (L)       | dorsal patterning                       | ANOVA | dorsal patterning            | 2       | 299     | 6.08             | <0.01     | **  |
| 4        | basking site colouration (H) | habitat colouration (H)                 | LM    | habitat colouration (H)      | 2       | 155     | 8.747            | <0.001    | *** |
|          | basking site colouration (S) | habitat colouration (S)                 | LM    | habitat colouration (S)      | 2       | 155     | 11.35            | <0.001    | *** |
|          | basking site colouration (L) | habitat colouration (L)                 | LM    | habitat colouration (L)      | 2       | 155     | 11.51            | <0.001    | *** |
| 5        | dorsal colouration (H)       | basking site colouration (H), sex       | GLM   | basking site colouration (H) | 2       | 162     | 3.567            | <0.001    | *** |
|          | dorsal colouration (S)       | basking site colouration (S), sex       | GLM   | -                            | -       | -       | -                | -         |     |
|          | dorsal colouration (L)       | basking site colouration (L), sex       | GLM   | basking site colouration (L) | 2       | 160     | -2.139           | <0.05     | *   |
| 6        | dorsal colouration (H)       | habitat colouration (H), sex            | GLM   | habitat colouration          | 2       | 157     | 5.293            | <0.001    | *** |
|          | dorsal colouration (S)       | habitat colouration (S), sex            | GLM   | -                            | -       | -       | -                | -         |     |
|          | dorsal colouration (L)       | habitat colouration (L), sex            | GLM   | -                            | -       | -       | -                | -         |     |
| 7        | dorsal patterning            | basking site colouration (H, S, L), sex | GLM   | -                            | -       | -       | -                | -         |     |
| 8        | dorsal patterning            | habitat colouration (H, S, L), sex      | GLM   | -                            | -       | -       | -                | -         |     |

Abbreviations: H = hue, S = saturation, L = lightness.
