# Supplementary material for: Common lizard microhabitat selection varies by sex, parity mode, and colouration
Source: PubMed Central journal article supplement (PMC10478496; doi:10.1186/s12862-023-02158-2), 2023-09-04

**Additional file 3 - Figure S1.** Dorsal colouration differs between parity modes and correlates with body weight. Viviparous (A) and larger (B) individuals tended to have larger hue values compared to oviparous and smaller individuals.

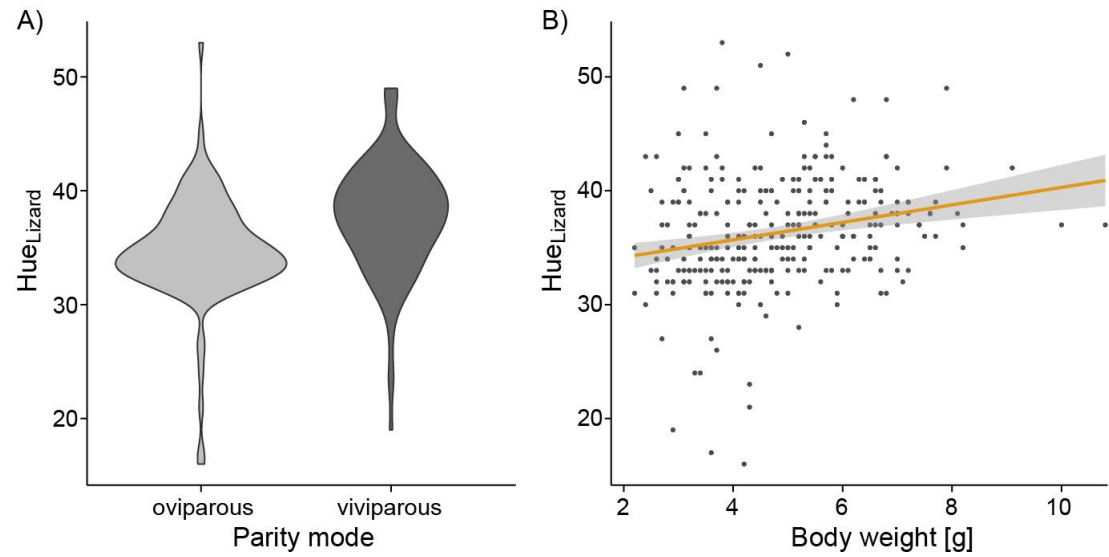

Supplement: 12862_2023_2158_MOESM3_ESM.pdf [file 12862_2023_2158_MOESM3_ESM.pdf]
