# Supplementary material for: Common lizard microhabitat selection varies by sex, parity mode, and colouration
Source: PubMed Central journal article supplement (PMC10478496; doi:10.1186/s12862-023-02158-2), 2023-09-04

**Additional File 4. Figure S2.** Histograms of A) the wider habitat lightness and B) basking site lightness.

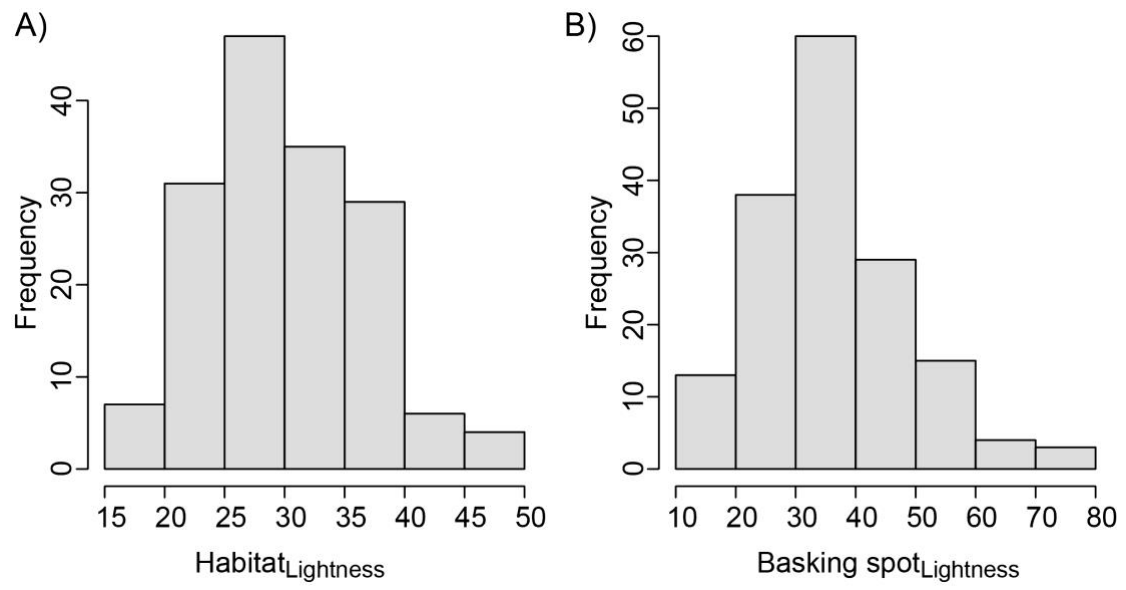

Supplement: 12862_2023_2158_MOESM4_ESM.pdf [file 12862_2023_2158_MOESM4_ESM.pdf]
